# Supplementary material for: Fusion of automatically learned rhythm and morphology features matches diagnostic criteria and enhances AI explainability
Source: Research Square preprint supplement (doi:10.21203/rs.3.rs-4655592/v1), 2024-08-23
Supplement: Supplementary file 1 [file 1367346772cf0543f1d83851.pdf]

**Table 1: Distribution of misclassifications per class by xECGArch with optimal weights, separated into cases that were misclassified by the long-term model only, the short-term model only, or both. Most cases that were misclassified by only one model could be compensated by a high decision reliability of the respective other model. AF, atrial fibrillation; NSR, normal sinus rhythm; O, others.**

|                                             | AF        | NSR       | O         | Total      |
|---------------------------------------------|-----------|-----------|-----------|------------|
| <b>Long-term model</b>                      | <b>28</b> | <b>11</b> | <b>19</b> | <b>58</b>  |
| Compensated                                 | 4         | 3         | 3         | 10         |
| Not compensated                             | 24        | 8         | 16        | 49         |
| <b>Short-term model</b>                     | <b>29</b> | <b>24</b> | <b>29</b> | <b>82</b>  |
| Compensated                                 | 7         | 16        | 12        | 35         |
| Not compensated                             | 22        | 8         | 17        | 47         |
| <b>Any model</b>                            | <b>37</b> | <b>29</b> | <b>35</b> | <b>101</b> |
| <b>xECGArch</b>                             | <b>26</b> | <b>10</b> | <b>20</b> | <b>56</b>  |
| Long-term model only                        | 4         | 2         | 3         | 9          |
| Short-term model only                       | 2         | 2         | 4         | 8          |
| Both models                                 | 20        | 6         | 13        | 39         |
| Absolute improvement by weight optimization | 1         | 4         | 4         | 9          |
| Total improvement by weight optimization    | 0         | 4         | 3         | 7          |
